# Supplementary material for: Direct Growth of Bacteria in Headspace Vials Allows for Screening of Volatiles by Gas Chromatography Mass Spectrometry
Source: Front Microbiol. 2018 Mar 20;9:491. doi: 10.3389/fmicb.2018.00491 (PMC5890184; doi:10.3389/fmicb.2018.00491)
Supplement: Table S1 — Custom library for putative compound identification. [file DataSheet1.XLSX]

## Sheet: MOPS Media
	Component	Mfg/part #	MOPS+glucose	MOPS+glucose +EZ	MOPS+Rich	MOPS+glucose + yeast extract
	MOPS (MW 209.3)	Teknova, M2101	40mM	40mM	40mM	40mM
	Tricine (MW 179.2)	Teknova, M2101	4.0mM	4.0mM	4.0mM	4.0mM
	Iron Sulfate Stock	Teknova, M2101	0.01mM	0.01mM	0.01mM	0.01mM
	Ammonium Chloride	Teknova, M2101	9.5mM	9.5mM	9.5mM	9.5mM
	Potassium Sulfate	Teknova, M2101	0.276mM	0.276mM	0.276mM	0.276mM
	Calcium Chloride	Teknova, M2101	0.0005mM	0.0005mM	0.0005mM	0.0005mM
	Magnesium Chloride	Teknova, M2101	0.525mM	0.525mM	0.525mM	0.525mM
	Sodium Chloride	Teknova, M2101	50mM	50mM	50mM	50mM
	Ammonium Molybdate	Teknova, M2101	3x10^-9 M	3x10^-9 M	3x10^-9 M	3x10^-9 M
	Boric Acid	Teknova, M2101	4x10^-7 M	4x10^-7 M	4x10^-7 M	4x10^-7 M
	Cobalt Chloride	Teknova, M2101	3x10^-8 M	3x10^-8 M	3x10^-8 M	3x10^-8 M
	Cupric Sulfate	Teknova, M2101	10^-8 M	10^-8 M	10^-8 M	10^-8 M
	Manganese Chloride	Teknova, M2101	8x10-8 M	8x10-8 M	8x10-8 M	8x10-8 M
	Zinc Sulfate	Teknova, M2101	10^-8 M	10^-8 M	10^-8 M	10^-8 M
	Potassium Phosphate Dibasic	Teknova, M2102	1.32mM	1.32mM	1.32mM	1.32mM
	Glucose	Teknova, G0520	10 mM	10 mM	10 mM	10 mM
	Agar	Teknova, A7777	15 g/L	15 g/L	15 g/L	15 g/L
	L-Alanine	Teknova, M2105		0.8mM	0.8mM
	L-Arginine	Teknova, M2105		5.2mM	5.2mM
	L-Asparigine	Teknova, M2105		0.4mM	0.4mM
	L-Aspartic Acid, Potassium Salt	Teknova, M2105		0.4mM	0.4mM
	L-Glutamic Acid, Potassium Salt	Teknova, M2105		0.66mM	0.66mM
	L-Glutamine	Teknova, M2105		0.6mM	0.6mM
	L-Glycine	Teknova, M2105		0.8mM	0.8mM
	L-Histidine HCl H2O	Teknova, M2105		0.2mM	0.2mM
	L-Isoleucine	Teknova, M2105		0.4mM	0.4mM
	L-Proline	Teknova, M2105		0.4mM	0.4mM
	L-Serine	Teknova, M2105		10mM	10mM
	L-Threonine	Teknova, M2105		0.4mM	0.4mM
	L-Tryptophan	Teknova, M2105		0.1mM	0.1mM
	L-Valine	Teknova, M2105		0.6mM	0.6mM
	L-Leucine	Teknova, M2105		0.8mM	0.8mM
	L-Lysine	Teknova, M2105		0.4mM	0.4mM
	L-Methionine	Teknova, M2105		0.2mM	0.2mM
	L-Phenylalinine	Teknova, M2105		0.4mM	0.4mM
	L-Cysteine HCl	Teknova, M2105		0.1mM	0.1mM
	L-Tyrosine	Teknova, M2105		0.2mM	0.2mM
	Thiamine	Teknova, M2105		0.01mM	0.01mM
	Calcium Pantothenate	Teknova, M2105		0.01mM	0.01mM
	para-Amino Benzoic Acid	Teknova, M2105		0.01mM	0.01mM
	para-Hydroxy benzoic Acid	Teknova, M2105		0.01mM	0.01mM
	di Hydroxy Benzoic Acid	Teknova, M2105		0.01mM	0.01mM
	Potassium Hydroxide	Teknova, M2103			1.5mM
	Adenine	Teknova, M2103			0.2mM
	Cytosine	Teknova, M2103			0.2mM
	Uracil	Teknova, M2103			0.2mM
	Guanine	Teknova, M2103			0.2mM
	yeast extract	Sigma, Y1625				10 g/L

## Sheet: VOC Library
Compound	CAS#	Origin	Reference
(3-methylbutyl)-oxirane	53229-41-7	manual entry from qualitative library matching	NIST Library
(6E)-nonenol	31502-19-9	manual entry from qualitative library matching	NIST Library
(6Z)-nonenol	35854-86-5	Glass beads rubbed on palms and backs of hands	Bernier (2000)
(α,4aα,8aβ)-octahydro-4,8a-dimethyl-4a(2H)-Naphthalenol	19700-21-1	manual entry from qualitative library matching	NIST Library
(E)-2-Decen-1-ol	18409-18-2	PDMS membrane placed on arm	Jiang (2013)
(E)-2-Decenal	3913-81-3	manual entry from qualitative library matching	NIST Library
(E)-2-hexen-1-ol	928-95-0	manual entry from qualitative library matching	NIST Library
(E)-3-dodecene	7239-23-8	manual entry from qualitative library matching	NIST Library
(E)-3-methyl-5-undecene	74630-67-4	manual entry from qualitative library matching	NIST Library
(E)-3-octene	14919-01-8	manual entry from qualitative library matching	NIST Library
(E)-4-octene	14850-23-8	manual entry from qualitative library matching	NIST Library
(E)-9-octadecenoic acid	112-79-8	manual entry from qualitative library matching	NIST Library
(S)-3(1-methyl-2-pyrrolidinyl)-pyridine	54-11-5	manual entry from qualitative library matching	NIST Library
(Z)-2-hexen-1-ol	928-94-9	Glass beads rubbed on palms and backs of hands	Bernier (2000)
(Z)-3-methyl-5-undecene	74630-64-1	Glass beads rubbed on palms and backs of hands	Bernier (2000)
(Z)-3-octene	14850-22-7	Glass beads rubbed on palms and backs of hands	Bernier (2000)
(Z)-4-octene	7642-15-1	Glass beads rubbed on palms and backs of hands	Bernier (2000)
(Z)-6-tridecene	6508-77-6	manual entry from qualitative library matching	NIST Library
(Z)-9-octadecenoic acid	112-80-1	Glass beads rubbed on palms and backs of hands	Bernier (2000)
1- propanol	71-23-8	SPME of bacterial liquid culture headspace	Tait (2014)
1-(2-methoxypropoxy)-2-propanol	13429-07-7	SPME of back and forearm skin	Gallagher (2008)
1,1'-oxybis-2-propanol	110-98-5	SPME of back and forearm skin	Gallagher (2008)
1,1'-sulfonylbis[4-chlorobenzene]	80-07-9	Glass beads rubbed on palms and backs of hands	Bernier (2000)
1,2,3,4-tetrahydroquinoline	635-46-1	Glass beads rubbed on palms and backs of hands	Bernier (2000)
1,2,3-trimethoxypropane	20637-49-4	Glass beads rubbed on palms and backs of hands	Bernier (2000)
1,2-benzenedicarboxylic acid	88-99-3	manual entry from qualitative library matching	NIST Library
1,3,4,6,7,8-hexahydro-4,6,6,7,8,8-hexamethylcyclopenta-gamma-2-benzopyran	1222-05-5	SPME of back and forearm skin	Gallagher (2008)
1,3-butanediamine	590-88-5	Glass beads rubbed on palms and backs of hands	Bernier (2000)
1,3-diacetyloxypropan-2-yl acetate	102-76-1	SPME of back and forearm skin	Gallagher (2008)
1,3-dimethoxybutane	10143-66-5	Glass beads rubbed on palms and backs of hands	Bernier (2000)
1,4-benzenedicarbonitrile	623-26-7	Glass beads rubbed on palms and backs of hands	Bernier (2000)
1,4-dimethylbenzene	106-42-3	Glass beads rubbed on palms and backs of hands	Bernier (2000)
1,5-dimethyl-1H-pyrazole	694-31-5	Glass beads rubbed on palms and backs of hands	Bernier (2000)
1,6-dichloro-1,5-cyclooctadiene	29480-42-0	Glass beads rubbed on palms and backs of hands	Bernier (2000)
1,7,7-trimethylbicyclo[221]heptan-2-one	76-22-2	SPME of back and forearm skin	Gallagher (2008)
1-[2-(2-benzylphenoxy)ethyl]-3-(O-tolyl) thiourea	n/a	manual entry from qualitative library matching	NIST Library
11-dodecen-2-one	5009-33-6	manual entry from qualitative library matching	NIST Library
11-phenoxyundecanoic acid	7170-44-7	Glass beads rubbed on palms and backs of hands	Bernier (2000)
13-methylpentadecanoic acid, methyl ester	5487-50-3	Glass beads rubbed on palms and backs of hands	Bernier (2000)
14-methylpentadecanoic acid, methyl ester	5129-60-2	Glass beads rubbed on palms and backs of hands	Bernier (2000)
16-methylheptadecanoic acid, methyl ester	5129-61-3	Glass beads rubbed on palms and backs of hands	Bernier (2000)
1-Butanol	71-36-3	Headspace from TEDLA bag containing worn t-shirt	Haze (2001)
1-chloro-4-(4-methyl-4-pentyl)benzene	74672-11-0	Glass beads rubbed on palms and backs of hands	Bernier (2000)
1-chlorododecane	112-52-7	Glass beads rubbed on palms and backs of hands	Bernier (2000)
1-chloroheptane	629-06-1	Glass beads rubbed on palms and backs of hands	Bernier (2000)
1-chlorohexadecane	4860-03-1	Glass beads rubbed on palms and backs of hands	Bernier (2000)
1-chlorohexane	544-10-5	Glass beads rubbed on palms and backs of hands	Bernier (2000)
1-chlorononane	2473-01-0	Glass beads rubbed on palms and backs of hands	Bernier (2000)
1-chloropentadecane	4862-03-7	Glass beads rubbed on palms and backs of hands	Bernier (2000)
1-chlorotetradecane	2425-54-9	Glass beads rubbed on palms and backs of hands	Bernier (2000)
1-Decanol	112-30-1	Headspace from TEDLA bag containing worn t-shirt	Haze (2001)
1-decene	872-05-9	manual entry from qualitative library matching	NIST Library
1-Dodecanol	112-53-8	PDMS membrane placed on arm	Jiang (2013)
1-dodecene	112-41-4	manual entry from qualitative library matching	NIST Library
1-hepten-3-ol	4938-52-7	Glass beads rubbed on palms and backs of hands	Bernier (2000)
1-Hexadecanol	36653-82-4	PDMS membrane placed on arm	Jiang (2013)
1-Hexanol	111-27-3	Headspace from TEDLA bag containing worn t-shirt	Haze (2001)
1-hexen-3-ol	4798-44-1	Glass beads rubbed on palms and backs of hands	Bernier (2000)
1H-indole	120-72-9	Glass beads rubbed on palms and backs of hands	Bernier (2000)
1-indol-4-yl 1,2,3-propatriol ether	61212-32-6	manual entry from qualitative library matching	NIST Library
1-isocyanato-3-methylbenzene	621-29-4	Glass beads rubbed on palms and backs of hands	Bernier (2000)
1-methyl-2-pentyl-cyclopropane	41977-37-1	manual entry from qualitative library matching	NIST Library
1-methylpiperazine	109-01-3	Glass beads rubbed on palms and backs of hands	Bernier (2000)
1-methylthiobutane	628-29-5	Glass beads rubbed on palms and backs of hands	Bernier (2000)
1-Nonanol	143-08-8	PDMS membrane placed on arm	Jiang (2013)
1-nonene	124-11-8	manual entry from qualitative library matching	NIST Library
1-octen-3-ol	3391-86-4	Glass beads rubbed on palms and backs of hands	Bernier (2000)
1-octen-3-ol	3391-86-4	SPME of back and forearm skin	Gallagher (2008)
1-Octene	111-66-0	Headspace from TEDLA bag containing worn t-shirt	Haze (2001)
1-pentadecene	13360-61-7	manual entry from qualitative library matching	NIST Library
1-pentanol	71-41-0	manual entry from qualitative library matching	NIST Library
1-phenyl-3-(1-piperidinyl)-2-buten-1-one	4620-54-6	Glass beads rubbed on palms and backs of hands	Bernier (2000)
1-phenyl-ethanone	98-86-2	SPME of back and forearm skin	Gallagher (2008)
1-phenylethylester acetic acid	93-92-5	SPME of back and forearm skin	Gallagher (2008)
1-piperidineethanol	3040-44-6	Glass beads rubbed on palms and backs of hands	Bernier (2000)
1-propanol	71-23-8	manual entry from qualitative library matching	NIST Library
1-tetradecanol	112-72-1	Glass beads rubbed on palms and backs of hands	Bernier (2000)
1-thiododecane	112-55-0	Glass beads rubbed on palms and backs of hands	Bernier (2000)
1-tridecene	2437-56-1	manual entry from qualitative library matching	NIST Library
1-undecanol	112-42-5	manual entry from qualitative library matching	NIST Library
1-undecene	821-95-4	SPME of bacterial liquid culture headspace	Tait (2014)
2-(2-aminophenyl)-ethanone	551-93-9	manual entry from qualitative library matching	NIST Library
2-(2H-benzotriazol-2-yl)-4-methylphenol	2440-22-4	Glass beads rubbed on palms and backs of hands	Bernier (2000)
2-(2-propyl)-5-methyl-1-cyclohexanol	n/a	SPME of back and forearm skin	Gallagher (2008)
2-(4-tert-butylphenyl)propanal	61136-74-1	SPME of back and forearm skin	Gallagher (2008)
2-(hydroxymethyl)-2-methyl-1,3-propanediol	77-85-0	Glass beads rubbed on palms and backs of hands	Bernier (2000)
2-(methylamino)-benzoic acid methyl ester	85-91-6	manual entry from qualitative library matching	NIST Library
2,2,4-Trimethyl-1,3-pentanediol diisobutyrate	6846-50-0	PDMS membrane placed on arm	Jiang (2013)
2,2,5-trimethyl-3,4-hexanedione	20633-03-8	PDMS membrane placed on arm	Jiang (2013)
2,2-dimethylbutane	75-83-2	PDMS membrane placed on arm	Jiang (2013)
2,2-dimethylhexanal	996-12-3	Glass beads rubbed on palms and backs of hands	Bernier (2000)
2,2-dimethyl-propanoic acid	75-98-9	manual entry from qualitative library matching	NIST Library
2,2-dimethyl-propanoic acid 2-phenylethylester	67662-96-8	manual entry from qualitative library matching	NIST Library
2,2-dimethyl-propanoic acid hydrazide	42826-42-6	manual entry from qualitative library matching	NIST Library
2,3,4,5-tetrahydropyridazine	694-06-4	SPME of bacterial liquid culture headspace	Tait (2014)
2,3,4-trimethylquinoline	2437-72-1	Glass beads rubbed on palms and backs of hands	Bernier (2000)
2,3-butadione	431-03-8	SPME of bacterial liquid culture headspace	Tait (2014)
2,3-dichlorobenzeneamine	608-27-5	Glass beads rubbed on palms and backs of hands	Bernier (2000)
2,3-dihydro-3,5-dihydroxy-6-methyl-4H-pyran-4-one	28564-83-2	Glass beads rubbed on palms and backs of hands	Bernier (2000)
2,3-dihydro-4-methylfuran	34314-83-5	Glass beads rubbed on palms and backs of hands	Bernier (2000)
2,4,6-tri-tert-butyl-phenol	732-26-3	SPME of back and forearm skin	Gallagher (2008)
2,4-dihydroxy-3,6-dimethylbenzoic acid, methyl ester	4707-47-5	Glass beads rubbed on palms and backs of hands	Bernier (2000)
2,4-dimethylhexane	489-43-5	Glass beads rubbed on palms and backs of hands	Bernier (2000)
2,4-nonadienal	6750-03-4	Glass beads rubbed on palms and backs of hands	Bernier (2000)
2,5-dimethylpiperazine	2815-34-1	Glass beads rubbed on palms and backs of hands	Bernier (2000)
2,5-di-tert-Butyl-1,4-benzoquinone	2460-77-7	manual entry from qualitative library matching	NIST Library
2,6-bis(1,1-dimethylethyl)-2,5-cyclohexadiene-1,4-dione	719-22-2	manual entry from qualitative library matching	NIST Library
2,6-bis(1,1-dimethylethyl)-4-(1-oxopropyl)phenol	14035-34-8	SPME of back and forearm skin	Gallagher (2008)
2,6-dimethyl-1-heptene	3074-78-0	Glass beads rubbed on palms and backs of hands	Bernier (2000)
2,6-dimethyl-7-octen-2-ol	18479-58-8	SPME of back and forearm skin	Gallagher (2008)
2,6-dimethylpyrazine	108-50-9	Glass beads rubbed on palms and backs of hands	Bernier (2000)
2,7-dimethyl-1-octene	33718-03-5	Glass beads rubbed on palms and backs of hands	Bernier (2000)
2-acetylthiazole	24295-03-2	manual entry from qualitative library matching	NIST Library
2-amino-1-phenyl-ethanone	613-89-8	manual entry from qualitative library matching	NIST Library
2-butanol	15892-23-6	Glass beads rubbed on palms and backs of hands	Bernier (2000)
2-butanone	78-93-3	SPME of bacterial liquid culture headspace	Tait (2014)
2-butenoic acid	3724-65-0	Glass beads rubbed on palms and backs of hands	Bernier (2000)
2-butenoic acid, butyl ester	7299-91-4	Glass beads rubbed on palms and backs of hands	Bernier (2000)
2-chloro-1-methylethylbenzene	824-47-5	Glass beads rubbed on palms and backs of hands	Bernier (2000)
2-cyclopentylidene-hydrazinecarbothioamide	7283-39-8	manual entry from qualitative library matching
2-decanol	1120-06-5	Glass beads rubbed on palms and backs of hands	Bernier (2000)
2-decanone	693-54-9	Glass beads rubbed on palms and backs of hands	Bernier (2000)
2-decen-1-ol	22104-80-9	manual entry from qualitative library matching	NIST Library
2-dodecanone	6175-49-1	manual entry from qualitative library matching	NIST Library
2-ethyl hexanol	104-76-7	SPME of back and forearm skin	Gallagher (2008)
2-ethyl-hexanoic acid	149-57-5	SPME of back and forearm skin	Gallagher (2008)
2-ethyl-hexanoic acid methyl ester	816-19-3	manual entry from qualitative library matching	NIST Library
2-Ethylhexanol	104-76-7	Headspace from TEDLA bag containing worn t-shirt	Haze (2001)
2-ethylhexyl-2-ethylhexanoate	7425-14-1	SPME of back and forearm skin	Gallagher (2008)
2-ethylhexylsalicylate	118-60-5	SPME of back and forearm skin	Gallagher (2008)
2-ethylpiperazine	13961-37-0	Glass beads rubbed on palms and backs of hands	Bernier (2000)
2-ethylpiperidine	1484-80-6	Glass beads rubbed on palms and backs of hands	Bernier (2000)
2-furanmethanol	98-00-0	Glass beads rubbed on palms and backs of hands	Bernier (2000)
2H-1-benzopyran-2-one	91-64-5	Glass beads rubbed on palms and backs of hands	Bernier (2000)
2-heptadecanol	16813-18-6	Glass beads rubbed on palms and backs of hands	Bernier (2000)
2-heptanone	110-43-0	SPME of bacterial liquid culture headspace	Tait (2014)
2-hexadecanol	14852-31-4	Glass beads rubbed on palms and backs of hands	Bernier (2000)
2-hexadecanone	18787-63-8	manual entry from qualitative library matching	NIST Library
2-hexanone	591-78-6	Glass beads rubbed on palms and backs of hands	Bernier (2000)
2-hydroxy, hexyl ester benzoic acid	6259-76-3	SPME of back and forearm skin	Gallagher (2008)
2-hydroxybenzoic acid, phenylmethyl ester	118-58-1	Glass beads rubbed on palms and backs of hands	Bernier (2000)
2-methoxy-2-octen-4-one	24985-48-6	Glass beads rubbed on palms and backs of hands	Bernier (2000)
2-methoxy-3-(1-methylethyl)-pyrazine	25773-40-4	manual entry from qualitative library matching	NIST Library
2-methoxy-5-methylthiophene	31053-55-1	Glass beads rubbed on palms and backs of hands	Bernier (2000)
2-methoxy-6-methyl-4H-pyran-4-one	4225-42-7	Glass beads rubbed on palms and backs of hands	Bernier (2000)
2-methyl butanoic acid	13201-46-2	SPME of bacterial liquid culture headspace	Tait (2014)
2-methyl-1-heptene	15870-10-7	Glass beads rubbed on palms and backs of hands	Bernier (2000)
2-methyl-1-hexene	6094-02-6	Glass beads rubbed on palms and backs of hands	Bernier (2000)
2-methyl-1H-pyrrole	636-41-9	Glass beads rubbed on palms and backs of hands	Bernier (2000)
2-methyl-2-butenal	1115-11-3	Glass beads rubbed on palms and backs of hands	Bernier (2000)
2-methyl-2-butenoic acid	13201-46-2	Glass beads rubbed on palms and backs of hands	Bernier (2000)
2-methyl-2-dodecene	55103-82-7	Glass beads rubbed on palms and backs of hands	Bernier (2000)
2-methyl-2-undecene	56888-88-1	Glass beads rubbed on palms and backs of hands	Bernier (2000)
2-methyl-3-octenol	266533-34-6	Glass beads rubbed on palms and backs of hands	Bernier (2000)
2-methyl-3-pentanol	565-67-3	Glass beads rubbed on palms and backs of hands	Bernier (2000)
2-methylbutanal	96-17-3	Glass beads rubbed on palms and backs of hands	Bernier (2000)
2-methylbutanal	96-17-3	SPME of bacterial liquid culture headspace	Tait (2014)
2-methylbutanoic acid	116-53-0	manual entry from qualitative library matching	NIST Library
2-methyl-butanoic acid 3-methylbutyl ester	27625-35-0	manual entry from qualitative library matching	NIST Library
2-methylfuran	534-22-5	Glass beads rubbed on palms and backs of hands	Bernier (2000)
2-methyl-heptadecane	1560-89-0	manual entry from qualitative library matching	NIST Library
2-methylheptanoic acid	1188-02-9	manual entry from qualitative library matching	NIST Library
2-methylhexadecanal	55019-46-0	Glass beads rubbed on palms and backs of hands	Bernier (2000)
2-methyl-hexadecanal	55019-46-0	manual entry from qualitative library matching	NIST Library
2-methylisoborneol	2371-42-8	manual entry from qualitative library matching	NIST Library
2-methylisothiazole	3581-87-1	Glass beads rubbed on palms and backs of hands	Bernier (2000)
2-methylpropanal	78-84-2	Glass beads rubbed on palms and backs of hands	Bernier (2000)
2-methylpyridine	109-06-8	Glass beads rubbed on palms and backs of hands	Bernier (2000)
2-nonadecanone	629-66-3	manual entry from qualitative library matching	NIST Library
2-nonanone	821-55-6	SPME of bacterial liquid culture headspace	Tait (2014)
2-nonen-4-one	32064-72-5	Glass beads rubbed on palms and backs of hands	Bernier (2000)
2-Nonenal	2463-53-8	Headspace from TEDLA bag containing worn t-shirt	Haze (2001)
2-octen-1-ol	22104-78-5	Glass beads rubbed on palms and backs of hands	Bernier (2000)
2-octene	111-67-1	Glass beads rubbed on palms and backs of hands	Bernier (2000)
2-pentadecanone	2345-28-0	manual entry from qualitative library matching	NIST Library
2-pentanone	107-87-9	Glass beads rubbed on palms and backs of hands	Bernier (2000)
2-pentanone	107-87-9	SPME of bacterial liquid culture headspace	Tait (2014)
2-phenyl ethanol	60-12-8	SPME of bacterial liquid culture headspace	Tait (2014)
2-propanone	67-64-1	SPME of back and forearm skin	Gallagher (2008)
2-propenoic acid	79-10-7	Glass beads rubbed on palms and backs of hands	Bernier (2000)
2-Propenoic acid, 2-methyl-, methyl ester	80-62-6	PDMS membrane placed on arm	Jiang (2013)
2-Propenoic acid, 3-(4-methoxyphenyl)-, 2-ethylhexyl ester	5466-77-3	PDMS membrane placed on arm	Jiang (2013)
2-tetradecanone	2345-27-9	manual entry from qualitative library matching	NIST Library
2-thiopropane	75-18-3	Glass beads rubbed on palms and backs of hands	Bernier (2000)
2-tridecanone	593-08-8	SPME of bacterial liquid culture headspace	Tait (2014)
2-undecanone	112-12-9	SPME of bacterial liquid culture headspace	Tait (2014)
3(1-methyl-2-pyrrolidinyl)pyridine (nicotine)	24851-98-7	Glass beads rubbed on palms and backs of hands	Bernier (2000)
3-(methylthio)-1,2-propanediol	22551-26-4	Glass beads rubbed on palms and backs of hands	Bernier (2000)
3', 4', 5,7-Tetramethoxyflavone	855-97-0	PDMS membrane placed on arm	Jiang (2013)
3,3,5-trimethyl-1,4-hexadiene	74753-00-7	PDMS membrane placed on arm	Jiang (2013)
3,4-dimethyl-1-hexene	16745-94-1	PDMS membrane placed on arm	Jiang (2013)
3,4-dimethyl-1-pentanol	6570-87-2	PDMS membrane placed on arm	Jiang (2013)
3,4-nonadiene	37050-03-6	Glass beads rubbed on palms and backs of hands	Bernier (2000)
3,5,5-trimethylcyclohex-2-en-1-one	78-59-1	SPME of back and forearm skin	Gallagher (2008)
3,7-dimethyl-1,6-octadien-3-ol	78-70-6	SPME of back and forearm skin	Gallagher (2008)
3,7-dimethyl-2,6-octadienal	5392-40-5	Glass beads rubbed on palms and backs of hands	Bernier (2000)
3,7-dimethyl-2,6-octadien-l-ol	106-25-2	SPME of back and forearm skin	Gallagher (2008)
3,7-dimethyl-6-octen-1-ol	106-22-9	Glass beads rubbed on palms and backs of hands	Bernier (2000)
3,7-dimethyl-6-octen-1-ol	106-22-9	SPME of back and forearm skin	Gallagher (2008)
3-acetyl-6-methyl-2H-pyran-2,4(3H)dione	520-45-6	Glass beads rubbed on palms and backs of hands	Bernier (2000)
3-chlorobenzeneamine	108-42-9	Glass beads rubbed on palms and backs of hands	Bernier (2000)
3-dodecanol	10203-30-2	manual entry from qualitative library matching	NIST Library
3-dodecen-1-ol	32451-95-9	manual entry from qualitative library matching	NIST Library
3-ethyl-1,4-hexadiene	2080-89-9	Glass beads rubbed on palms and backs of hands	Bernier (2000)
3-ethyl-2,5-dimethylpyrazine	13925-07-0	Glass beads rubbed on palms and backs of hands	Bernier (2000)
3-hydroxy-2-butanone	513-86-0	manual entry from qualitative library matching	NIST Library
3-hydroxy-4-methylbenzaldehyde	57295-30-4	Glass beads rubbed on palms and backs of hands	Bernier (2000)
3-hydroxyandrostan-11,17-dione	28336-28-9	Glass beads rubbed on palms and backs of hands	Bernier (2000)
3-hydroxybenzoic acid, methyl ester	19438-10-9	Glass beads rubbed on palms and backs of hands	Bernier (2000)
3-methyl butanal	590-86-3	SPME of bacterial liquid culture headspace	Tait (2014)
3-methyl butanoic acid	503-74-2	SPME of bacterial liquid culture headspace	Tait (2014)
3-methyl butanoic acid	503-74-2	SPME of bacterial liquid culture headspace	Tait (2014)
3-methyl-1-butanol	123-51-3	SPME of bacterial liquid culture headspace	Tait (2014)
3-methyl-1H-pyrrole	616-43-3	Glass beads rubbed on palms and backs of hands	Bernier (2000)
3-methyl-2-pentenoic acid	3675-21-6	Glass beads rubbed on palms and backs of hands	Bernier (2000)
3-methyl-4-penten-2-ol	1569-59-1	Glass beads rubbed on palms and backs of hands	Bernier (2000)
3-methylbutanal	590-86-3	SPME of bacterial liquid culture headspace	Tait (2014)
3-methylfuran	930-27-8	Glass beads rubbed on palms and backs of hands	Bernier (2000)
3-methylpentanal	15877-57-3	Glass beads rubbed on palms and backs of hands	Bernier (2000)
3-methylpentanoic acid	105-43-1	Glass beads rubbed on palms and backs of hands	Bernier (2000)
3-methyl-pentanoic acid	105-43-1	manual entry from qualitative library matching	NIST Library
3-methylthietane	22438-40-0	Glass beads rubbed on palms and backs of hands	Bernier (2000)
3-oxo-2-pentyl-cyclopentaneacetic acid, methyl ester	24851-98-7	manual entry from qualitative library matching	NIST Library
3-pentanone	96-22-0	Glass beads rubbed on palms and backs of hands	Bernier (2000)
3-pyridinamine	462-08-8	Glass beads rubbed on palms and backs of hands	Bernier (2000)
4-(1,1-dimethylethyl)-benzenepropanal	18127-01-0	manual entry from qualitative library matching	NIST Library
4(1H)-pyridinone	108-96-3	Glass beads rubbed on palms and backs of hands	Bernier (2000)
4,4'-dimethyl-1,1'-biphenyl	613-33-2	Glass beads rubbed on palms and backs of hands	Bernier (2000)
4,5-dihydro-2-methyl-1H-imidazole	534-26-9	Glass beads rubbed on palms and backs of hands	Bernier (2000)
4,7-dimethylundecane	17301-32-5	PDMS membrane placed on arm	Jiang (2013)
4-cyanocyclohexene	100-45-8	SPME of back and forearm skin	Gallagher (2008)
4-dodecanol	10203-32-4	manual entry from qualitative library matching	NIST Library
4-dodecen-1-ol	40642-37-3	manual entry from qualitative library matching	NIST Library
4-ethyl-3-heptene	33933-74-3	Glass beads rubbed on palms and backs of hands	Bernier (2000)
4-hexen-1-ol	928-92-7	Glass beads rubbed on palms and backs of hands	Bernier (2000)
4-hydroxy-3-methoxybenzoic acid	121-34-6	Glass beads rubbed on palms and backs of hands	Bernier (2000)
4-hydroxybenzoic acid	99-96-7	Glass beads rubbed on palms and backs of hands	Bernier (2000)
4-hydroxybenzoic acid, propyl ester	94-13-3	Glass beads rubbed on palms and backs of hands	Bernier (2000)
4-Methyl-2-pentanone	108-10-1	Headspace from TEDLA bag containing worn t-shirt	Haze (2001)
4-methyl-2-pentene	4461-48-7	Glass beads rubbed on palms and backs of hands	Bernier (2000)
4-methyl-2-pyridinamine	695-34-1	Glass beads rubbed on palms and backs of hands	Bernier (2000)
4-methyl-4-undecene	74630-57-2	Glass beads rubbed on palms and backs of hands	Bernier (2000)
4-methyldecane	2847-72-5	PDMS membrane placed on arm	Jiang (2013)
4-methyl-hexadecane	25117-26-4	manual entry from qualitative library matching	NIST Library
4-methylhexanoic acid	52745-93-4	SPME of bacterial liquid culture headspace	Tait (2014)
4-nonene	2198-23-4	Glass beads rubbed on palms and backs of hands	Bernier (2000)
4-phenylmethoxybenzaldehyde	4397-53-9	Glass beads rubbed on palms and backs of hands	Bernier (2000)
4-piperidinemethanamine	7144-05-0	Glass beads rubbed on palms and backs of hands	Bernier (2000)
4-pyridinamine	504-24-5	Glass beads rubbed on palms and backs of hands	Bernier (2000)
4-tert-butylcyclohexyl acetate	32210-23-4	SPME of back and forearm skin	Gallagher (2008)
4-tert-butylcyclohexyl acetate	32210-23-4	PDMS membrane placed on arm	Jiang (2013)
5-(hydroxymethyl)-2-furaldehyde	67-47-0	SPME of back and forearm skin	Gallagher (2008)
5,9,13-trimethyl-4,8,12-tetradecatrienal	66408-55-7	PDMS membrane placed on arm	Jiang (2013)
5-acetyl-2-methylpyridine	42972-46-3	manual entry from qualitative library matching	NIST Library
5-decene	19689-19-1	Glass beads rubbed on palms and backs of hands	Bernier (2000)
5-dodecenol	629936-12-3	manual entry from qualitative library matching	NIST Library
5-hexyldihyro-2(3H)-Furanone	706-14-9	manual entry from qualitative library matching	NIST Library
5-methyl-2-(1-methylethyl)-, [1R-(1α,2β,5α)]-cyclohexanol	2216-51-5	PDMS membrane placed on arm	Jiang (2013)
5-methyl-2(5H)thiophenone	7210-64-2	Glass beads rubbed on palms and backs of hands	Bernier (2000)
5-methyl-2-methylthio-4(1H)-pyrimidinone	20651-30-3	Glass beads rubbed on palms and backs of hands	Bernier (2000)
6,10,14-trimethyl-2-pentadecanone	502-69-2	manual entry from qualitative library matching	NIST Library
6,10-dimethyl-5,9-undecadien-2-one	689-67-8	PDMS membrane placed on arm	Jiang (2013)
6,10-dimethyl-5,9-undecadien-2-one	689-67-8	Glass beads rubbed on palms and backs of hands	Bernier (2000)
6-amino-3-pyridine carboxylic acid	3167-49-5	Glass beads rubbed on palms and backs of hands	Bernier (2000)
6-methyl-3,5-heptadien-2-one	1604-28-0	Glass beads rubbed on palms and backs of hands	Bernier (2000)
6-methyl-5-hepten-2-one	110-93-0	PDMS membrane placed on arm	Jiang (2013)
6-methyl-5-hepten-2-one	110-93-0	Glass beads rubbed on palms and backs of hands	Bernier (2000)
6-methyl-5-hepten-2-one	110-93-0	SPME of back and forearm skin	Gallagher (2008)
6-Methyl-5-heptenone	110-93-0	Headspace from TEDLA bag containing worn t-shirt	Haze (2001)
6-tridecanol	5770-03-6	manual entry from qualitative library matching	NIST Library
8-hydroxy-2-octanone	25368-54-1	manual entry from qualitative library matching	NIST Library
9,12-octadecadienoic acid	60-33-3	Glass beads rubbed on palms and backs of hands	Bernier (2000)
9-[tetrahydro-2H-pyran-2-yl)oxy]-2-nonanone	54699-41-1	manual entry from qualitative library matching	NIST Library
9-decen-1-ol	13019-22-2	SPME of bacterial liquid culture headspace	Tait (2014)
9-hexadecenoic acid	2091-29-4	Glass beads rubbed on palms and backs of hands	Bernier (2000)
9-hydroxy-2-nonanone	25368-56-3	manual entry from qualitative library matching	NIST Library
9-octadecene	7206-25-9	Glass beads rubbed on palms and backs of hands	Bernier (2000)
acetaldehyde	75-07-0	SPME of bacterial liquid culture headspace	Tait (2014)
Acetic acid	64-19-7	Glass beads rubbed on palms and backs of hands	Bernier (2000)
Acetic acid	64-19-7	SPME of back and forearm skin	Gallagher (2008)
Acetic acid	64-19-7	Headspace from TEDLA bag containing worn t-shirt	Haze (2001)
acetoin	513-86-0	SPME of bacterial liquid culture headspace	Tait (2014)
acetylthiocarbamic acid, methyl ester	16696-87-0	Glass beads rubbed on palms and backs of hands	Bernier (2000)
α-methyl-benenemethanamine	98-84-0	manual entry from qualitative library matching	NIST Library
Amyl alcohol	71-41-0	Headspace from TEDLA bag containing worn t-shirt	Haze (2001)
Benzaldehyde	100-52-7	Glass beads rubbed on palms and backs of hands	Bernier (2000)
Benzaldehyde	100-52-7	SPME of back and forearm skin	Gallagher (2008)
benzene	71-43-2	Glass beads rubbed on palms and backs of hands	Bernier (2000)
benzeneacetaldehyde	122-78-1	manual entry from qualitative library matching	NIST Library
benzofuran	271-89-6	Glass beads rubbed on palms and backs of hands	Bernier (2000)
Benzoic acid	65-85-0	Glass beads rubbed on palms and backs of hands	Bernier (2000)
Benzoic acid	65-85-0	SPME of back and forearm skin	Gallagher (2008)
benzyl alcohol	100-51-6	Glass beads rubbed on palms and backs of hands	Bernier (2000)
benzylchloride	100-44-7	Glass beads rubbed on palms and backs of hands	Bernier (2000)
butanimidamide	107-90-4	manual entry from qualitative library matching	NIST Library
Butanoic acid	107-92-6	SPME of back and forearm skin	Gallagher (2008)
butanoic acid, methyl ester	623-42-7	Glass beads rubbed on palms and backs of hands	Bernier (2000)
butanone	78-93-3	Glass beads rubbed on palms and backs of hands	Bernier (2000)
butyl 2-methyl butanoate	15706-73-7	SPME of bacterial liquid culture headspace	Tait (2014)
butyl butanoate	109-21-7	SPME of bacterial liquid culture headspace	Tait (2014)
butyloxirane	1436-34-6	manual entry from qualitative library matching	NIST Library
Butyric acid	107-92-6	Headspace from TEDLA bag containing worn t-shirt	Haze (2001)
carbon disulfide	75-15-0	Glass beads rubbed on palms and backs of hands	Bernier (2000)
Cedrol	77-53-2	SPME of back and forearm skin	Gallagher (2008)
cholest-5-en-3-ol	1182-66-7	Glass beads rubbed on palms and backs of hands	Bernier (2000)
cholesta-3,5-diene	747-90-0	Glass beads rubbed on palms and backs of hands	Bernier (2000)
cis-2-nonene	6434-77-1	manual entry from qualitative library matching	NIST Library
cis-7-tetradecen-1-ol	40642-43-1	SPME of bacterial liquid culture headspace	Tait (2014)
cyclodecane	293-96-9	manual entry from qualitative library matching	NIST Library
cyclododecene	1501-82-2	manual entry from qualitative library matching	NIST Library
cyclohexadecane	295-65-8	Glass beads rubbed on palms and backs of hands	Bernier (2000)
cyclotetradecane	295-17-0	Glass beads rubbed on palms and backs of hands	Bernier (2000)
Decanal	112-31-2	Glass beads rubbed on palms and backs of hands	Bernier (2000)
Decanal	112-31-2	SPME of back and forearm skin	Gallagher (2008)
Decanal	112-31-2	Headspace from TEDLA bag containing worn t-shirt	Haze (2001)
Decanal	112-31-2	PDMS membrane placed on arm	Jiang (2013)
Decane	124-18-5	Glass beads rubbed on palms and backs of hands	Bernier (2000)
Decane	124-18-5	Headspace from TEDLA bag containing worn t-shirt	Haze (2001)
Decane	124-18-5	PDMS membrane placed on arm	Jiang (2013)
decanoic acid	334-48-5	Glass beads rubbed on palms and backs of hands	Bernier (2000)
decyl acetate	112-17-4	SPME of bacterial liquid culture headspace	Tait (2014)
Diethyl Phthalate	84-66-2	PDMS membrane placed on arm	Jiang (2013)
dihydro-2-methyl-3(2H)-thiophenone	13679-85-1	manual entry from qualitative library matching	NIST Library
dihydro-5-tetradecyl-2(3H)furanone	502-26-1	Glass beads rubbed on palms and backs of hands	Bernier (2000)
dimethyl disulfide	624-92-0	Glass beads rubbed on palms and backs of hands	Bernier (2000)
dimethyl trisulfide	3658-80-8	manual entry from qualitative library matching	NIST Library
dimethylpentadiene	1000-86-8	Glass beads rubbed on palms and backs of hands	Bernier (2000)
dimethyl-silanediol	1066-42-8	manual entry from qualitative library matching	NIST Library
dimethylsulfide	75-18-3	manual entry from qualitative library matching	NIST Library
Dimethylsulphone	67-71-0	SPME of back and forearm skin	Gallagher (2008)
docosane	629-97-0	Glass beads rubbed on palms and backs of hands	Bernier (2000)
docosanoic acid	112-85-6	Glass beads rubbed on palms and backs of hands	Bernier (2000)
Dodecanal	112-54-9	Glass beads rubbed on palms and backs of hands	Bernier (2000)
Dodecanal	112-54-9	SPME of back and forearm skin	Gallagher (2008)
Dodecanal	112-54-9	PDMS membrane placed on arm	Jiang (2013)
Dodecane	112-40-3	Headspace from TEDLA bag containing worn t-shirt	Haze (2001)
Dodecane	112-40-3	PDMS membrane placed on arm	Jiang (2013)
dodecane	112-40-3	manual entry from qualitative library matching	NIST Library
dodecanoic acid	143-07-7	Glass beads rubbed on palms and backs of hands	Bernier (2000)
dodecenol	35289-31-7	Glass beads rubbed on palms and backs of hands	Bernier (2000)
dometrizole	2440-22-4	manual entry from qualitative library matching	NIST Library
Eicosane	112-95-8	PDMS membrane placed on arm	Jiang (2013)
ethanol	64-17-5	SPME of bacterial liquid culture headspace	Tait (2014)
ethenyl-cyclooctane	61142-41-4	manual entry from qualitative library matching	NIST Library
ethyl 2-methyl butanoate	53956-13-1	SPME of bacterial liquid culture headspace	Tait (2014)
ethyl acetate	141-78-6	SPME of bacterial liquid culture headspace	Tait (2014)
ethyl butanoate	105-54-4	SPME of bacterial liquid culture headspace	Tait (2014)
ethyl hexanoate	123-66-0	SPME of bacterial liquid culture headspace	Tait (2014)
ethylbenzene	100-41-4	Glass beads rubbed on palms and backs of hands	Bernier (2000)
ethylene glycol	107-21-1	Glass beads rubbed on palms and backs of hands	Bernier (2000)
Furfuryl alcohol	98-00-0	SPME of back and forearm skin	Gallagher (2008)
Furfurylmethylamphetamine	13445-60-8	PDMS membrane placed on arm	Jiang (2013)
Galaxolide	1222-05-5	PDMS membrane placed on arm	Jiang (2013)
Geranylacetone	689-67-8	SPME of back and forearm skin	Gallagher (2008)
glycerol	56-81-5	Glass beads rubbed on palms and backs of hands	Bernier (2000)
heneicosane	629-94-7	Glass beads rubbed on palms and backs of hands	Bernier (2000)
heptadecane	629-78-7	Glass beads rubbed on palms and backs of hands	Bernier (2000)
heptadecane	629-78-7	manual entry from qualitative library matching	NIST Library
heptadecanoic acid	506-12-7	Glass beads rubbed on palms and backs of hands	Bernier (2000)
heptadecanoic acid, methyl ester	1731-92-6	Glass beads rubbed on palms and backs of hands	Bernier (2000)
heptadecenoic acid	506-12-7	Glass beads rubbed on palms and backs of hands	Bernier (2000)
Heptanal	111-71-7	Glass beads rubbed on palms and backs of hands	Bernier (2000)
Heptanal	111-71-7	Headspace from TEDLA bag containing worn t-shirt	Haze (2001)
Heptanal	111-71-7	PDMS membrane placed on arm	Jiang (2013)
heptane	142-82-5	Glass beads rubbed on palms and backs of hands	Bernier (2000)
heptanedioic acid	111-16-0	Glass beads rubbed on palms and backs of hands	Bernier (2000)
heptanedioic acid, dibutyl ester	51238-94-9	Glass beads rubbed on palms and backs of hands	Bernier (2000)
heptanoic acid	111-14-8	Glass beads rubbed on palms and backs of hands	Bernier (2000)
Hexadecanal	629-80-1	PDMS membrane placed on arm	Jiang (2013)
hexadecane	544-76-3	Glass beads rubbed on palms and backs of hands	Bernier (2000)
hexadecanoic acid	57-10-3	Glass beads rubbed on palms and backs of hands	Bernier (2000)
Hexadecanoic acid, 1-methylethyl ester	142-91-6	SPME of back and forearm skin	Gallagher (2008)
hexadecanoic acid, butyl ester	111-06-8	Glass beads rubbed on palms and backs of hands	Bernier (2000)
Hexadecanoic acid, methyl ester	112-39-0	Glass beads rubbed on palms and backs of hands	Bernier (2000)
Hexadecanoic acid, methyl ester	112-39-0	PDMS membrane placed on arm	Jiang (2013)
Hexadecanol	36653-82-4	Headspace from TEDLA bag containing worn t-shirt	Haze (2001)
hexadecene	629-73-2	Glass beads rubbed on palms and backs of hands	Bernier (2000)
Hexanal	66-25-1	Headspace from TEDLA bag containing worn t-shirt	Haze (2001)
Hexanal	66-25-1	PDMS membrane placed on arm	Jiang (2013)
hexane	110-54-3	Glass beads rubbed on palms and backs of hands	Bernier (2000)
hexanedioic acid	124-04-9	Glass beads rubbed on palms and backs of hands	Bernier (2000)
hexanedioic acid, ester	626-86-8	Glass beads rubbed on palms and backs of hands	Bernier (2000)
hexanedioic acid, ester branched	68954-45-0	Glass beads rubbed on palms and backs of hands	Bernier (2000)
hexanedioic acid, mono(2-ethylhexyl) ester	4337-65-9	Glass beads rubbed on palms and backs of hands	Bernier (2000)
hexanedioic acid, octyl ester	123-79-5	Glass beads rubbed on palms and backs of hands	Bernier (2000)
Hexanoic acid	142-62-1	Glass beads rubbed on palms and backs of hands	Bernier (2000)
Hexanoic acid	142-62-1	SPME of back and forearm skin	Gallagher (2008)
Homomethylsalicylate	118-56-9	SPME of back and forearm skin	Gallagher (2008)
hydroxybutanoic acid, ethyl ester	5405-41-4	Glass beads rubbed on palms and backs of hands	Bernier (2000)
indole, substituted	120-72-9	Glass beads rubbed on palms and backs of hands	Bernier (2000)
Isooctanol	26952-21-6	PDMS membrane placed on arm	Jiang (2013)
isopropyl Myristate	110-27-0	PDMS membrane placed on arm	Jiang (2013)
Isopropyl Palmitate	142-91-6	PDMS membrane placed on arm	Jiang (2013)
Isovaleric acid	503-74-2	SPME of back and forearm skin	Gallagher (2008)
lactic acid	50-21-5	Glass beads rubbed on palms and backs of hands	Bernier (2000)
menthane	99-82-1	Glass beads rubbed on palms and backs of hands	Bernier (2000)
Methanesulfonyl chloride	124-63-0	PDMS membrane placed on arm	Jiang (2013)
Methanesulfonyl chloride	124-63-0	Glass beads rubbed on palms and backs of hands	Bernier (2000)
Methoxy acetic acid, dodecyl ester	n/a	SPME of back and forearm skin	Gallagher (2008)
methoxy-phenyl-oxime	n/a	manual entry from qualitative library matching	NIST Library
Methyl 2-pentyl-3-oxo-1-cyclopentyl acetate	24851-98-7	SPME of back and forearm skin	Gallagher (2008)
methyl iodide	74-88-4	Glass beads rubbed on palms and backs of hands	Bernier (2000)
methyl-2-ethyldecanoate	20483-47-0	manual entry from qualitative library matching	NIST Library
methyldodecanoic acid	111-82-0	Glass beads rubbed on palms and backs of hands	Bernier (2000)
methyldodecene	n/a	Glass beads rubbed on palms and backs of hands	Bernier (2000)	Tait, E., Perry, J. D., Stanforth, S. P. & Dean, J. R. Identification of Volatile Organic Compounds Produced by Bacteria Using HS-SPME-GC–MS. J. Chromatogr. Sci. 52, 363–373 (2014).
methylheptadecane	1560-89-0	Glass beads rubbed on palms and backs of hands	Bernier (2000)
methylheptadecanoic acid	1731-92-6	Glass beads rubbed on palms and backs of hands	Bernier (2000)
methylhexadecanoic acid	112-39-0	Glass beads rubbed on palms and backs of hands	Bernier (2000)
methylpentadecanoic acid	7132-64-1	Glass beads rubbed on palms and backs of hands	Bernier (2000)
methyltetradecanoic acid	124-10-7	Glass beads rubbed on palms and backs of hands	Bernier (2000)
methyltetradecanoic acid	124-10-7	Glass beads rubbed on palms and backs of hands	Bernier (2000)
methyltetradecanoic acid	124-10-7	Glass beads rubbed on palms and backs of hands	Bernier (2000)
methyltridecanoic acid	1731-88-0	Glass beads rubbed on palms and backs of hands	Bernier (2000)
methylurea	598-50-5	Glass beads rubbed on palms and backs of hands	Bernier (2000)
m-menth-6-ene	13837-70-2	Glass beads rubbed on palms and backs of hands	Bernier (2000)
N,N-bis(2-hydroxyethyl)dodecanamide	120-40-1	Glass beads rubbed on palms and backs of hands	Bernier (2000)
N,N-didodecyl formamide	55282-35-4	Glass beads rubbed on palms and backs of hands	Bernier (2000)
N,N-diethyl-3-methylbenzamide (DEET)	134-62-3	Glass beads rubbed on palms and backs of hands	Bernier (2000)
N,N-dimethyl-1,2-ethanediamine	108-00-9	Glass beads rubbed on palms and backs of hands	Bernier (2000)
N,N-dimethyl-1-dodecanamine	112-18-5	Glass beads rubbed on palms and backs of hands	Bernier (2000)
N,N-dimethyl-1-heptadecanamine	3002-57-1	Glass beads rubbed on palms and backs of hands	Bernier (2000)
N,N-dimethyl-1-hexadecanamine	112-69-6	Glass beads rubbed on palms and backs of hands	Bernier (2000)
N,N-dimethyl-1-octadecanamine	124-28-7	Glass beads rubbed on palms and backs of hands	Bernier (2000)
N,N-dimethyl-1-pentadecanamine	17678-60-3	Glass beads rubbed on palms and backs of hands	Bernier (2000)
N,N-dimethyl-1-tetradecanamine	112-75-4	Glass beads rubbed on palms and backs of hands	Bernier (2000)
N,N-dimethyl-1-tridecanamine	17373-29-4	Glass beads rubbed on palms and backs of hands	Bernier (2000)
N,N-dimethyl-3-benzyloxypropylamine	71126-69-7	Glass beads rubbed on palms and backs of hands	Bernier (2000)
N,N-dimethyl-3-butoxypropylamine	71126-65-3	Glass beads rubbed on palms and backs of hands	Bernier (2000)
N,N-dimethylthiourea	534-13-4	Glass beads rubbed on palms and backs of hands	Bernier (2000)
n-Amyl isovalerate	25415-62-7	manual entry from qualitative library matching	NIST Library
N-ethylcyclopentamine	45592-46-9	Glass beads rubbed on palms and backs of hands	Bernier (2000)
N-methyl-N-nitroso-1-dodecanamine	55090-44-3	Glass beads rubbed on palms and backs of hands	Bernier (2000)
Nonadecane	629-92-5	PDMS membrane placed on arm	Jiang (2013)
Nonanal	124-19-6	Glass beads rubbed on palms and backs of hands	Bernier (2000)
Nonanal	124-19-6	SPME of back and forearm skin	Gallagher (2008)
Nonanal	124-19-6	Headspace from TEDLA bag containing worn t-shirt	Haze (2001)
Nonanal	124-19-6	PDMS membrane placed on arm	Jiang (2013)
Nonane	111-84-2	Glass beads rubbed on palms and backs of hands	Bernier (2000)
Nonane	111-84-2	PDMS membrane placed on arm	Jiang (2013)
nonanoic acid	112-05-0	Glass beads rubbed on palms and backs of hands	Bernier (2000)
nonanoic acid, methyl ester	1731-84-6	Glass beads rubbed on palms and backs of hands	Bernier (2000)
o-(2-butenylthio)phenol	29549-68-6	Glass beads rubbed on palms and backs of hands	Bernier (2000)
octadecane	593-45-3	Glass beads rubbed on palms and backs of hands	Bernier (2000)
octadecanoic acid	57-11-4	Glass beads rubbed on palms and backs of hands	Bernier (2000)
octadecanoic acid, methyl ester	112-61-8	Glass beads rubbed on palms and backs of hands	Bernier (2000)
octadecanoic acid, phenyl ester	637-55-8	Glass beads rubbed on palms and backs of hands	Bernier (2000)
Octadecanol	112-92-5	Headspace from TEDLA bag containing worn t-shirt	Haze (2001)
octadecenoic acid, methyl ester	2462-84-2	Glass beads rubbed on palms and backs of hands	Bernier (2000)
Octanal	124-13-0	Glass beads rubbed on palms and backs of hands	Bernier (2000)
Octanal	124-13-0	SPME of back and forearm skin	Gallagher (2008)
Octanal	124-13-0	Headspace from TEDLA bag containing worn t-shirt	Haze (2001)
Octanal	124-13-0	PDMS membrane placed on arm	Jiang (2013)
octane	111-65-9	Glass beads rubbed on palms and backs of hands	Bernier (2000)
octanoic acid	124-07-2	Glass beads rubbed on palms and backs of hands	Bernier (2000)
Octanol	68603-15-6	Headspace from TEDLA bag containing worn t-shirt	Haze (2001)
Octanonic acid	124-07-2	SPME of back and forearm skin	Gallagher (2008)
oxazole	288-42-6	Glass beads rubbed on palms and backs of hands	Bernier (2000)
Oxilic acid, cylcobutylisohexyl ester	n/a	PDMS membrane placed on arm	Jiang (2013)
p-cresol	106-44-5	SPME of back and forearm skin	Gallagher (2008)
p-cymene	99-87-6	SPME of back and forearm skin	Gallagher (2008)
pentacosane	629-99-2	Glass beads rubbed on palms and backs of hands	Bernier (2000)
Pentadecanal	2765-11-9	PDMS membrane placed on arm	Jiang (2013)
pentadecane	629-62-9	Glass beads rubbed on palms and backs of hands	Bernier (2000)
pentadecanoic acid	1002-84-2	Glass beads rubbed on palms and backs of hands	Bernier (2000)
pentadecenoic acid	17351-34-7	Glass beads rubbed on palms and backs of hands	Bernier (2000)
pentanedioc acid, ethyl methyl ester	51503-30-1	manual entry from qualitative library matching	NIST Library
pentanedioic acid, ester	1501-27-5	Glass beads rubbed on palms and backs of hands	Bernier (2000)
pentanedioic acid, mono(2-ethylhexyl) ester	n/a	Glass beads rubbed on palms and backs of hands	Bernier (2000)
pentene	109-67-1	Glass beads rubbed on palms and backs of hands	Bernier (2000)
pentylcyclopropane	2511-91-3	PDMS membrane placed on arm	Jiang (2013)
Phenol	108-95-2	Glass beads rubbed on palms and backs of hands	Bernier (2000)
Phenol	108-95-2	SPME of back and forearm skin	Gallagher (2008)
Phenyl ethyl alcohol	60-12-8	SPME of back and forearm skin	Gallagher (2008)
Phenyl ethyl alcohol	60-12-8	Glass beads rubbed on palms and backs of hands	Bernier (2000)
phenylacetaldehyde	122-78-1	SPME of bacterial liquid culture headspace	Tait (2014)
Phthalic acid, butyl 2-pentyl ester	3461-29-8	PDMS membrane placed on arm	Jiang (2013)
phthalic acid, monoethyl ester	2306-33-4	manual entry from qualitative library matching	NIST Library
phthalic anhydride	85-44-9	manual entry from qualitative library matching	NIST Library
p-menth-1-en-8-ol	98-55-5	SPME of back and forearm skin	Gallagher (2008)
propanal	123-38-6	Glass beads rubbed on palms and backs of hands	Bernier (2000)
propanal	123-38-6	SPME of bacterial liquid culture headspace	Tait (2014)
propanamide	79-05-0	Glass beads rubbed on palms and backs of hands	Bernier (2000)
Propanoic acid	79-09-4	Glass beads rubbed on palms and backs of hands	Bernier (2000)
Propanoic acid	79-09-4	SPME of back and forearm skin	Gallagher (2008)
Propanoic acid, 2-methyl-, 1-(1,1-dimethylethyl)-2-methyl-1,3-propanediyl ester	74381-40-1	PDMS membrane placed on arm	Jiang (2013)
Propanoic acid, 2-methyl-, 3-hydroxy-2,4,4-trimethylpentyl ester	74367-34-3	PDMS membrane placed on arm	Jiang (2013)
propylbenzene	103-65-1	Glass beads rubbed on palms and backs of hands	Bernier (2000)
pyrazine	290-37-9	Glass beads rubbed on palms and backs of hands	Bernier (2000)
Pyridine	110-86-1	Glass beads rubbed on palms and backs of hands	Bernier (2000)
Pyridine	110-86-1	SPME of back and forearm skin	Gallagher (2008)
Pyrrolidine	123-75-1	PDMS membrane placed on arm	Jiang (2013)
S-methyl 3-methylbutanethioate	23747-45-7	manual entry from qualitative library matching	NIST Library
squalene	7683-64-9	Glass beads rubbed on palms and backs of hands	Bernier (2000)
Styrene	100-42-5	Glass beads rubbed on palms and backs of hands	Bernier (2000)
Styrene	100-42-5	PDMS membrane placed on arm	Jiang (2013)
tert-butyl 3,3-dimethylbutyl ether	4419-58-3	manual entry from qualitative library matching	NIST Library
tetracosane	646-31-1	Glass beads rubbed on palms and backs of hands	Bernier (2000)
tetracosanoic acid, methyl ester	2442-49-1	Glass beads rubbed on palms and backs of hands	Bernier (2000)
tetradecane	629-59-4	Glass beads rubbed on palms and backs of hands	Bernier (2000)
tetradecanoic acid	544-63-8	Glass beads rubbed on palms and backs of hands	Bernier (2000)
Tetradecanoic acid, 1-methylethyl ester	110-27-0	SPME of back and forearm skin	Gallagher (2008)
tetradecanoic acid, undecyl ester	2040-64-4	Glass beads rubbed on palms and backs of hands	Bernier (2000)
tetradecene	1120-36-1	Glass beads rubbed on palms and backs of hands	Bernier (2000)
tetradecenoic acid	544-64-9	Glass beads rubbed on palms and backs of hands	Bernier (2000)
thiazolidine	504-78-9	Glass beads rubbed on palms and backs of hands	Bernier (2000)
thiocarbamic acid, butyl ester	n/a	Glass beads rubbed on palms and backs of hands	Bernier (2000)
thiomethane	74-93-1	Glass beads rubbed on palms and backs of hands	Bernier (2000)
thiourea	62-56-6	Glass beads rubbed on palms and backs of hands	Bernier (2000)
toluene	108-88-3	Glass beads rubbed on palms and backs of hands	Bernier (2000)
Triacetin	102-76-1	manual entry from qualitative library matching	NIST Library
triacontene	18435-53-5	Glass beads rubbed on palms and backs of hands	Bernier (2000)
tricosane	638-67-5	Glass beads rubbed on palms and backs of hands	Bernier (2000)
Tridecanal	10486-19-8	PDMS membrane placed on arm	Jiang (2013)
tridecanoic acid	638-53-9	Glass beads rubbed on palms and backs of hands	Bernier (2000)
tridecanoic acid, methyl ester	1731-88-0	Glass beads rubbed on palms and backs of hands	Bernier (2000)
tridecanol	112-70-9	Glass beads rubbed on palms and backs of hands	Bernier (2000)
trimethyl-1,5-heptadiene	33501-88-1	Glass beads rubbed on palms and backs of hands	Bernier (2000)
trimethyl-3-methylenehexadecane	504-96-1	Glass beads rubbed on palms and backs of hands	Bernier (2000)
trimethylpyrazine	14667-55-1	Glass beads rubbed on palms and backs of hands	Bernier (2000)
undecadiene	13688-67-0	Glass beads rubbed on palms and backs of hands	Bernier (2000)
Undecanal	112-44-7	PDMS membrane placed on arm	Jiang (2013)
Undecane	1120-21-4	Headspace from TEDLA bag containing worn t-shirt	Haze (2001)
Undecane	1120-21-4	PDMS membrane placed on arm	Jiang (2013)
undecanoic acid	112-37-8	Glass beads rubbed on palms and backs of hands	Bernier (2000)
urea	57-13-6	Glass beads rubbed on palms and backs of hands	Bernier (2000)
Z-1,6-Tridecadiene	n/a	manual entry from qualitative library matching	NIST Library
α-hexyl cinnamaldehyde	101-86-0	SPME of back and forearm skin	Gallagher (2008)
α-methyl-β-(p-tert-butylphenyl)propanal	80-54-6	SPME of back and forearm skin	Gallagher (2008)

## Sheet: bacterial strains
	Species	strain	Source	Ordering Id.
	Pseudomonas aeruginosa	PAO1-LAC	ATCC	ATCC 47085
	Staphylococcus epidermidis 1	FDA strain PCI 1200	ATCC	ATCC 12228
	Staphylococcus epidermidis 2	Fussel	ATCC	ATCC 14990
	Staphylococcus epidermidis 3	SK135	BEI	HM-118
	Rhodococcus erythropolis	SK121	BEI	HM-116
	Acinetobacter radioresistans	SK82	BEI	HM-107
	Brevibacterium epidermidis	NCDO 2286	ATCC	ATCC 35514
	Corynebacterium xerosis		ATCC	ATCC 373
